# Supplementary material for: Ecosystem-wide metagenomic binning enables prediction of ecological niches from genomes
Source: PubMed Central journal article supplement (PMC7070063; doi:10.1038/s42003-020-0856-x), 2020-03-13
Supplement: 42003_2020_856_MOESM1_ESM.pdf [file 42003_2020_856_MOESM1_ESM.pdf]

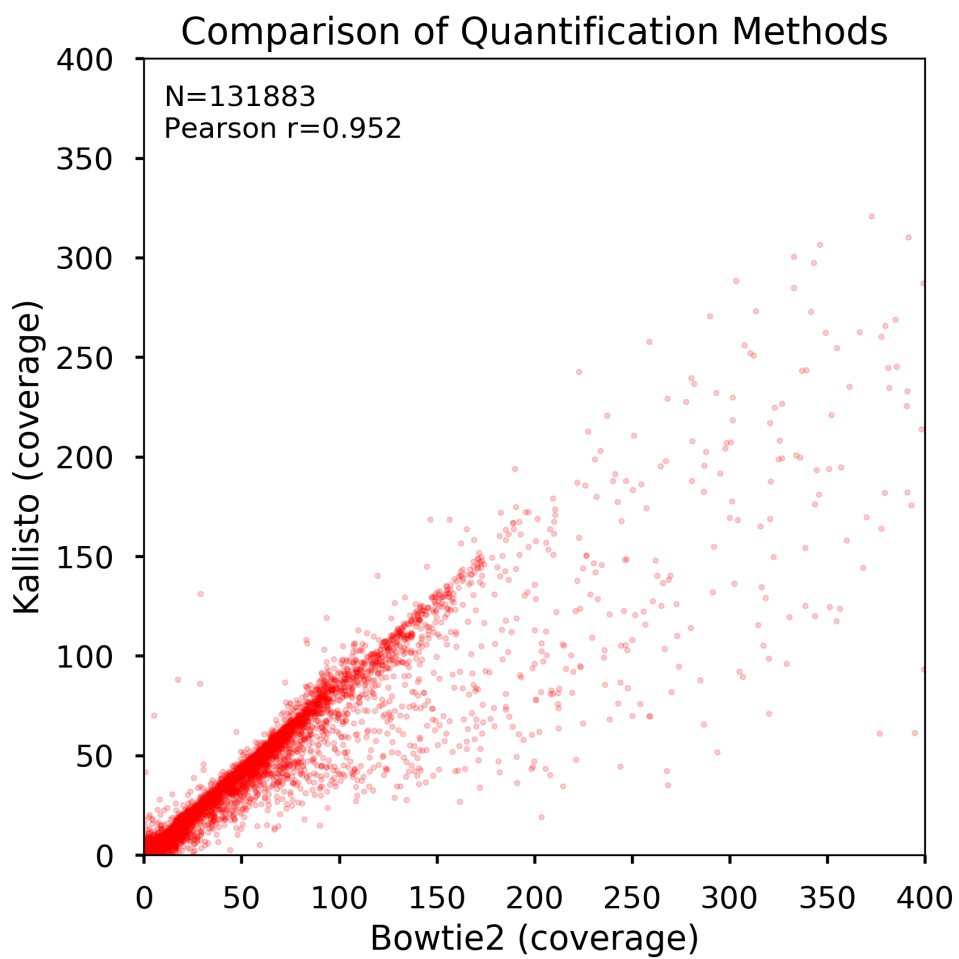

**Supplementary Figure 1.** Comparison of contig quantifications obtained with Kallisto and Bowtie2. Each point corresponds to one contig; all contigs derive from the same metagenome sample. The reads that were used for quantification come from another sample.

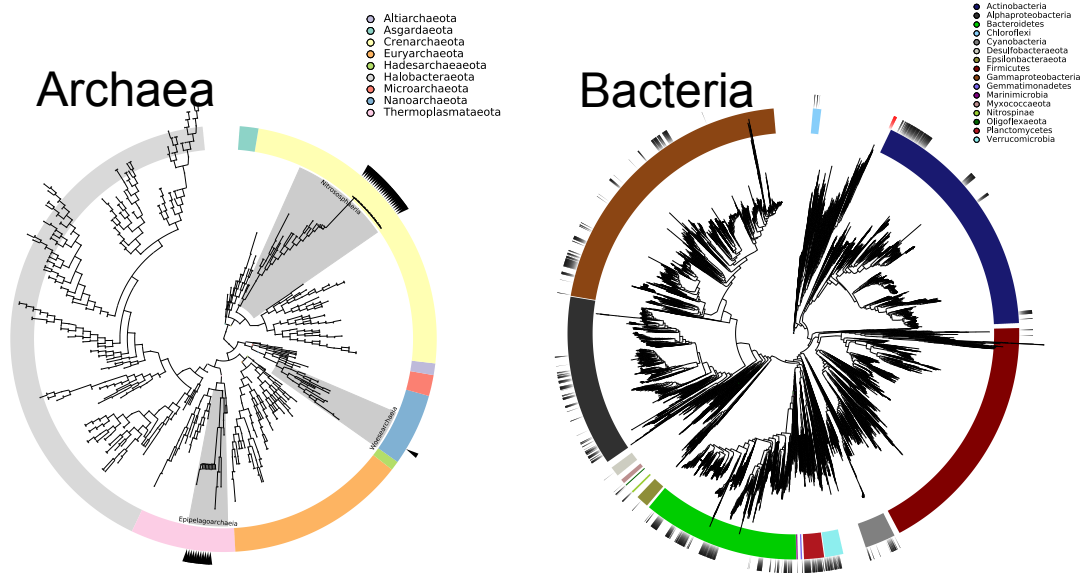

**Supplementary Figure 2.** Genome Taxonomy Database (GTDB) phylogenetic trees with the MAGs obtained in this study inserted. *Thermus thermophilus* MAGs obtained from the spike-in DNA are indicated with red arrows, all other MAGs with black arrows.

|                  |                 |              | CheckM estimates (in percentage) |         |                   | Mummer alignments against reference genome (in percentage) |                  |                    |                  |                    |                  |
|------------------|-----------------|--------------|----------------------------------|---------|-------------------|------------------------------------------------------------|------------------|--------------------|------------------|--------------------|------------------|
| ID               | MAG length (bp) | n50 len (bp) | Completeness                     | Contam. | Strain heterogen. | Chromosome                                                 |                  | Plasmid pTT27      |                  | Plasmid pTT8       |                  |
|                  |                 |              |                                  |         |                   | Aligned ref. bases                                         | Average identity | Aligned ref. bases | Average identity | Aligned ref. bases | Average identity |
| P1994_101_bin107 | 2169312         | 92640        | 99.58                            | 0       | 0                 | 99.83                                                      | 99.98            | 99.51              | 99.96            | 100                | 100              |
| P1994_102_bin142 | 2165903         | 91962        | 99.58                            | 0       | 0                 | 99.53                                                      | 99.97            | 99.42              | 99.96            | 100                | 100              |
| P1994_103_bin65  | 2177942         | 94990        | 99.58                            | 0       | 0                 | 99.49                                                      | 99.98            | 99.48              | 99.83            | 100                | 100              |
| P1994_104_bin21  | 2170841         | 94897        | 99.58                            | 0       | 0                 | 99.99                                                      | 99.97            | 99.64              | 99.97            | 100                | 100              |
| P1994_105_bin111 | 1864526         | 16199        | 86.05                            | 0       | 0                 | 86.18                                                      | 99.94            | 88.95              | 99.96            | 10.13              | 99.26            |
| P1994_106_bin14  | 2173387         | 77393        | 99.58                            | 0       | 0                 | 99.93                                                      | 99.98            | 99.44              | 99.97            | 100                | 100              |
| P1994_107_bin50  | 1858350         | 3851         | 84.6                             | 0.94    | 25                | 85.63                                                      | 99.93            | 89.44              | 99.78            | 100                | 100              |
| P1994_108_bin218 | 2165889         | 94911        | 99.58                            | 0       | 0                 | 99.48                                                      | 99.97            | 99.54              | 99.77            | 100                | 100              |
| P1994_110_bin108 | 2170433         | 94895        | 99.58                            | 0       | 0                 | 99.77                                                      | 99.97            | 99.55              | 99.76            | 100                | 100              |
| P1994_111_bin90  | 2166422         | 91036        | 99.58                            | 0       | 0                 | 99.95                                                      | 99.96            | 99.66              | 99.96            | 100                | 100              |
| P1994_112_bin6   | 2170845         | 91876        | 99.58                            | 0       | 0                 | 99.99                                                      | 99.96            | 99.61              | 99.95            | 100                | 100              |
| P1994_113_bin206 | 2169068         | 84441        | 98.94                            | 0       | 0                 | 99.98                                                      | 99.97            | 99.26              | 99.91            | 100                | 100              |
| P1994_114_bin162 | 2169614         | 68004        | 99.58                            | 0       | 0                 | 99.94                                                      | 99.98            | 99.76              | 99.78            | 100                | 100              |
| P1994_115_bin22  | 2159853         | 19991        | 98.52                            | 0.42    | 100               | 99.78                                                      | 99.94            | 98.46              | 99.94            | 100                | 100              |
| P1994_116_bin172 | 2167853         | 94918        | 99.58                            | 0       | 0                 | 99.30                                                      | 99.98            | 98.42              | 99.84            | 100                | 100              |
| P1994_117_bin132 | 2169952         | 94918        | 99.58                            | 0       | 0                 | 99.94                                                      | 99.98            | 99.14              | 99.94            | 100                | 100              |
| P1994_118_bin6   | 2168350         | 92060        | 99.58                            | 0       | 0                 | 99.76                                                      | 99.98            | 98.27              | 99.98            | 100                | 100              |
| P1994_119_bin191 | 2169969         | 91977        | 99.36                            | 0       | 0                 | 99.96                                                      | 99.96            | 99.61              | 99.83            | 100                | 100              |
| P1994_120_bin89  | 2168245         | 94919        | 99.58                            | 0       | 0                 | 99.81                                                      | 99.98            | 99.30              | 99.81            | 100                | 100              |
| P1994_121_bin88  | 2165532         | 119112       | 99.58                            | 0       | 0                 | 99.73                                                      | 99.97            | 99.17              | 99.99            | 100                | 99.92            |
| P1994_122_bin164 | 2170746         | 92064        | 99.58                            | 0       | 0                 | 99.81                                                      | 99.98            | 99.42              | 99.99            | 100                | 100              |
| P1994_123_bin13  | 2166444         | 94918        | 99.58                            | 0       | 0                 | 99.81                                                      | 99.98            | 98.00              | 99.71            | 100                | 99.97            |
| P1994_124_bin173 | 2162444         | 94919        | 99.58                            | 0       | 0                 | 99.37                                                      | 99.98            | 98.96              | 99.99            | 100                | 100              |
| P1994_125_bin183 | 2170378         | 91955        | 99.58                            | 0       | 0                 | 99.94                                                      | 99.97            | 99.59              | 99.98            | 100                | 100              |
| P1994_126_bin183 | 2171116         | 94919        | 99.58                            | 0       | 0                 | 99.85                                                      | 99.97            | 98.55              | 99.95            | 100                | 100              |
| P1994_127_bin47  | 2159860         | 52869        | 99.36                            | 0       | 0                 | 99.52                                                      | 99.95            | 98.82              | 99.86            | 100                | 100              |
| P1994_129_bin128 | 2169229         | 94919        | 99.58                            | 0       | 0                 | 99.83                                                      | 99.98            | 98.58              | 99.94            | 100                | 100              |
| P1994_130_bin6   | 2170618         | 94919        | 99.58                            | 0       | 0                 | 99.94                                                      | 99.97            | 99.49              | 99.83            | 100                | 100              |

| Reference segment | Length (bp)    |
|-------------------|----------------|
| Chromosome        | 1849742        |
| Plasmid pTT27     | 256992         |
| Plasmid pTT8      | 9322           |
| <b>Total</b>      | <b>2116056</b> |

**Supplementary Table 1.** Assembly statistics, CheckM genome quality estimates, and statistics from aligning the 28 different *T. thermophilus* MAGs to the reference genome (*T. thermophilus* HB8). The different segments were aligned to separately using MUMmer.

| Variable                  | Variance explained | Prediction method |                  |                |                   |
|---------------------------|--------------------|-------------------|------------------|----------------|-------------------|
|                           |                    | Phylogenetic      | Ridge regression | Random forests | Gradient boosting |
| PC1                       | 0.11               | 0.48              | 0.72             | 0.71           | 0.74              |
| PC2                       | 0.05               | 0.68              | 0.68             | 0.70           | 0.70              |
| PC3                       | 0.04               | 0.60              | 0.68             | 0.65           | 0.64              |
| PC4                       | 0.02               | 0.57              | 0.67             | 0.67           | 0.66              |
| PC5                       | 0.02               | 0.65              | 0.75             | 0.73           | 0.79              |
| PC6                       | 0.02               | 0.49              | 0.60             | 0.61           | 0.64              |
| PC7                       | 0.01               | 0.69              | 0.68             | 0.70           | 0.69              |
| PC8                       | 0.01               | 0.51              | 0.51             | 0.47           | 0.54              |
| PC9                       | 0.01               | 0.40              | 0.38             | 0.44           | 0.46              |
| PC10                      | 0.01               | 0.64              | 0.57             | 0.61           | 0.60              |
| high sal-to-low sal ratio |                    | 0.67              | 0.74             | 0.72           | 0.70              |
| surface-to-mid ratio      |                    | 0.62              | 0.76             | 0.77           | 0.81              |
| 3um-to-0.8um ratio        |                    | 0.76              | 0.73             | 0.73           | 0.75              |

**Supplementary Table 2.** Results from ecological niche predictions. The first ten variables are the scores for first ten principal coordinates from the PCoA on the BACL abundance profiles, with proportion of variation explained by the principal coordinates indicated. The last three variables are the niche variables illustrated in Fig. 3 (log ratio between abundance in high and low salinity samples, log ratio between abundance in surface and mid layer, and log ratio between abundance on 3.0  $\mu\text{m}$  and 0.8  $\mu\text{m}$  filters). For each prediction method the Spearman correlation coefficient is given between the predicted and observed value.



|                        | #BACL | Variance explained | Prediction method |                  |                |                   |
|------------------------|-------|--------------------|-------------------|------------------|----------------|-------------------|
|                        |       |                    | Phylogenetic      | Ridge regression | Random forests | Gradient boosting |
| <b>PC1</b>             |       |                    |                   |                  |                |                   |
| p__Actinobacteria      | 68    | 0.22               | 0.40              | 0.55             | 0.70           | 0.67              |
| p__Bacteroidetes       | 83    | 0.23               | 0.32              | 0.73             | 0.75           | 0.78              |
| c__Alphaproteobacteria | 43    | 0.24               | 0.22              | 0.35             | 0.46           | 0.33              |
| c__Gammaproteobacteria | 54    | 0.25               | 0.44              | 0.72             | 0.67           | 0.71              |
| <b>PC2</b>             |       |                    |                   |                  |                |                   |
| p__Actinobacteria      | 68    | 0.09               | 0.52              | 0.62             | 0.60           | 0.62              |
| p__Bacteroidetes       | 83    | 0.08               | 0.33              | 0.48             | 0.58           | 0.60              |
| c__Alphaproteobacteria | 43    | 0.14               | 0.62              | 0.63             | 0.58           | 0.53              |
| c__Gammaproteobacteria | 54    | 0.10               | 0.69              | 0.52             | 0.59           | 0.67              |
| <b>PC3</b>             |       |                    |                   |                  |                |                   |
| p__Actinobacteria      | 68    | 0.06               | 0.50              | 0.58             | 0.49           | 0.54              |
| p__Bacteroidetes       | 83    | 0.05               | 0.42              | 0.61             | 0.52           | 0.53              |
| c__Alphaproteobacteria | 43    | 0.10               | 0.64              | 0.58             | 0.69           | 0.77              |
| c__Gammaproteobacteria | 54    | 0.08               | 0.51              | 0.32             | 0.45           | 0.53              |

**Supplementary Table 3.** Results from predicting the first three principal coordinate scores from PCoAs on BACL abundance profiles run on one taxonomic group at a time, with number of BACLs included and proportion of variation explained by the principal coordinates indicated. Spearman correlation coefficients between predicted and observed values are given for each prediction method. “p\_\_” stands for phylum and “c\_\_” class in the GTDB taxonomy.
