# Supplementary material for: Ecosystem-wide metagenomic binning enables prediction of ecological niches from genomes
Source: PubMed Central journal article supplement (PMC7070063; doi:10.1038/s42003-020-0856-x), 2020-03-13
Supplement: 42003_2020_856_MOESM3_ESM.pdf [file 42003_2020_856_MOESM3_ESM.pdf]

## **Description of Additional Supplementary Files**

**File Name:** **Supplementary Data 1**

**Description:** Taxonomic classification and summary statistics for the MAGs
